# Supplementary material for: Preferred zinc-modified melamine phytate for the flame retardant polylactide with limited smoke release
Source: Royal Society of Chemistry journal article supplement (doi:10.1039/d1nj02219a), 2021-01-01
Supplement: d1nj02219a1.pdf [file d1nj02219a1.pdf]

## **Supporting information**

Preferred zinc modified melamine phytate for the flame  
retardant polylactide with limited smoke release

*Dong Wang, Yang Wang, Xuhui Zhang, Ting Li, Mingliang Du, Mingqing Chen and Weifu Dong\**

\* Corresponding author. E-mail: [wfdong@jiangnan.edu.cn](mailto:wfdong@jiangnan.edu.cn).

Key Laboratory of Synthetic and Biological Colloids, Ministry of Education, School of Chemical  
and Material Engineering, Jiangnan University, 1800 Lihu Road, Wuxi 214122, China

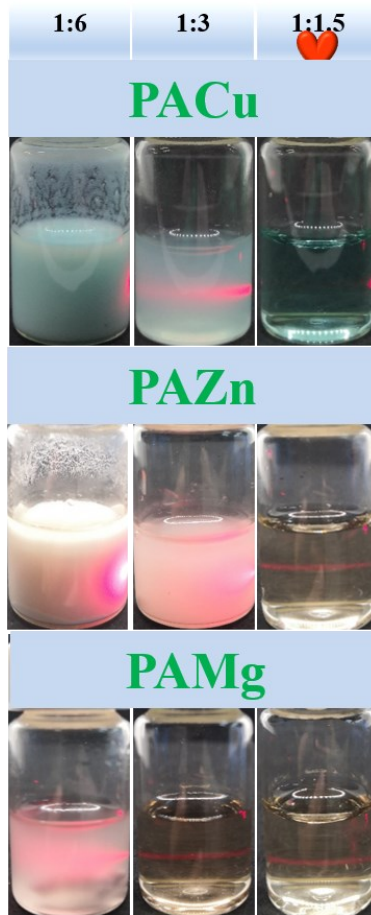

**Figure S1.** The solubility of divalent metal ion phytate in aqueous solution (0.1 g/mL) in different proportions.

**Table S1.** Formulations of PLA and PLA composites by mass fraction

| Samples                 | PLA (wt%) | MPA (wt%) | MPACu (wt%) | MPAZn (wt%) | MPAMg (wt%) |
|-------------------------|-----------|-----------|-------------|-------------|-------------|
| Neat PLA                | 100       | 0         | 0           | 0           | 0           |
| PLA/MPA <sub>20</sub>   | 100       | 20        | 0           | 0           | 0           |
| PLA/MPACu <sub>20</sub> | 100       | 0         | 20          | 0           | 0           |
| PLA/MPAZn <sub>20</sub> | 100       | 0         | 0           | 20          | 0           |
| PLA/MPAMg <sub>20</sub> | 100       | 0         | 0           | 0           | 20          |

**Table S2.** The Semi-quantitative Elemental Proportion of MPA and MPAZn Measured by XPS

| Samples | N: P: R <sup>2+</sup> (At.%) |
|---------|------------------------------|
| MPA     | 25.6: 6: 0                   |
| MPACu   | 19.8: 6: 0.75                |
| MPAZn   | 23.3: 6: 0.92                |
| MPAMg   | 26.3: 6: 0.3                 |

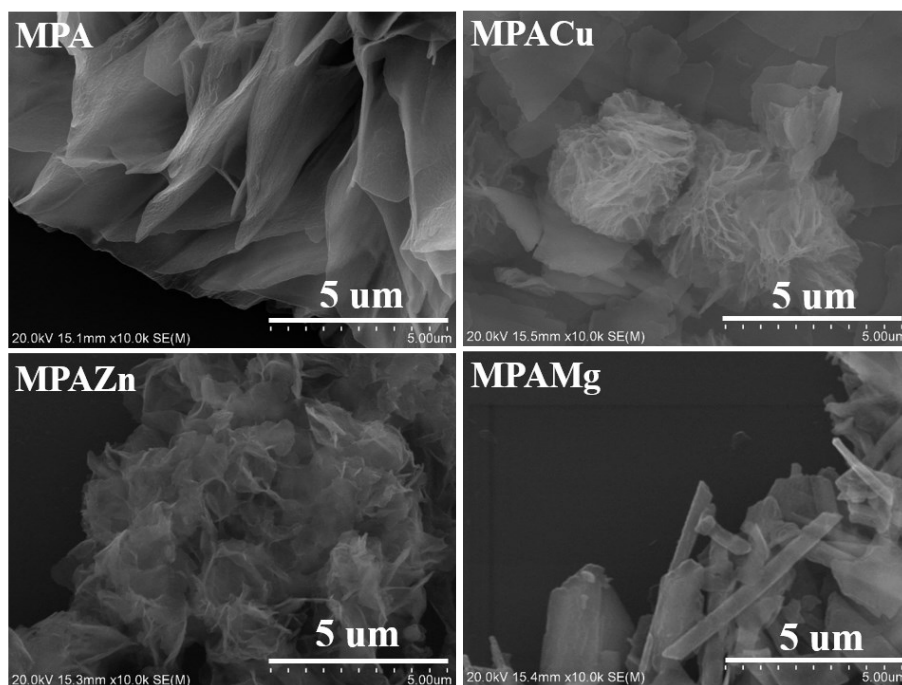

**Figure S2.** The representative SEM images of MPA and MPAZn nanosheets before ball-milling.

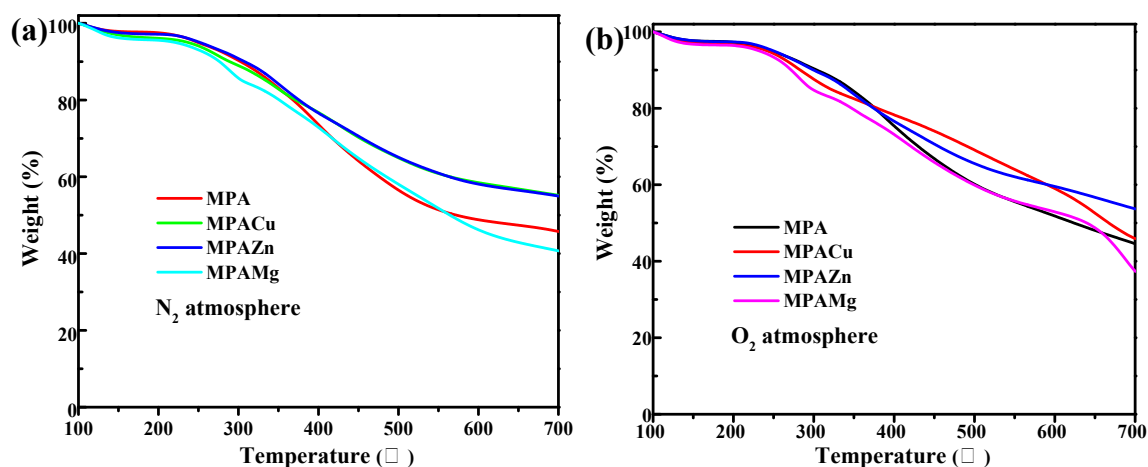

**Figure S3.** The TGA curves of MPA and MPARs under N<sub>2</sub> (a) or O<sub>2</sub> (b) atmosphere.

**Table S3.** Data of TGA for MPA, MPARs, PLA and PLA Composites under N<sub>2</sub> and O<sub>2</sub> Atmosphere

| Samples                 | N <sub>2</sub> atmosphere  |                                 |             | O <sub>2</sub> atmosphere  |                                 |             |
|-------------------------|----------------------------|---------------------------------|-------------|----------------------------|---------------------------------|-------------|
|                         | $T_{\text{onset}}$<br>(°C) | Residual weight at 700 °C (wt%) |             | $T_{\text{onset}}$<br>(°C) | Residual weight at 700 °C (wt%) |             |
|                         |                            | Experimental                    | Theoretical |                            | Experimental                    | Theoretical |
| MPA                     | 248.7                      | 38.5                            | /           | 247.3                      | 44.6                            | /           |
| MPACu                   | 236.7                      | 55.2                            | /           | 241.7                      | 45.9                            | /           |
| MPAZn                   | 251.7                      | 55.0                            | /           | 250.3                      | 53.7                            | /           |
| MPAMg                   | 220.7                      | 40.7                            | /           | 232.3                      | 37.4                            | /           |
| Neat PLA                | 343.5                      | 1.0                             | /           | 324.5                      | 0.5                             | /           |
| PLA/MPA <sub>20</sub>   | 318.7                      | 11.0                            | 7.3         | 319.2                      | 2.1                             | 7.9         |
| PLA/MPACu <sub>20</sub> | 326.4                      | 10.3                            | 10.0        | 325.2                      | 6.5                             | 8.1         |
| PLA/MPAZn <sub>20</sub> | 312.9                      | 9.7                             | 10.0        | 312.3                      | 6.3                             | 9.4         |
| PLA/MPAMg <sub>20</sub> | 301.8                      | 10.0                            | 7.6         | 297.8                      | 4.4                             | 6.6         |

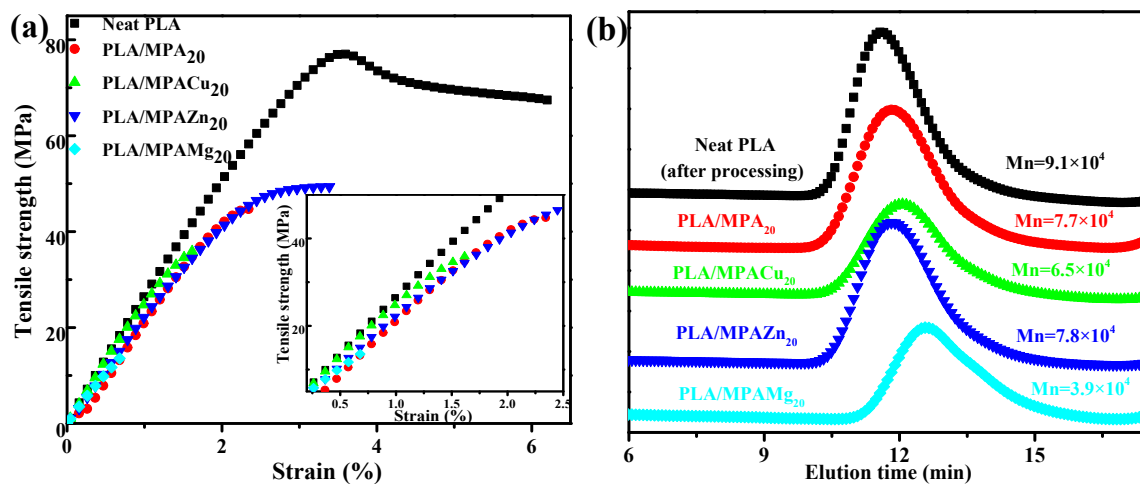

**Figure S4.** The typical stress-strain curves (a) and detected GPC traces (b) of PLA and PLA composites.

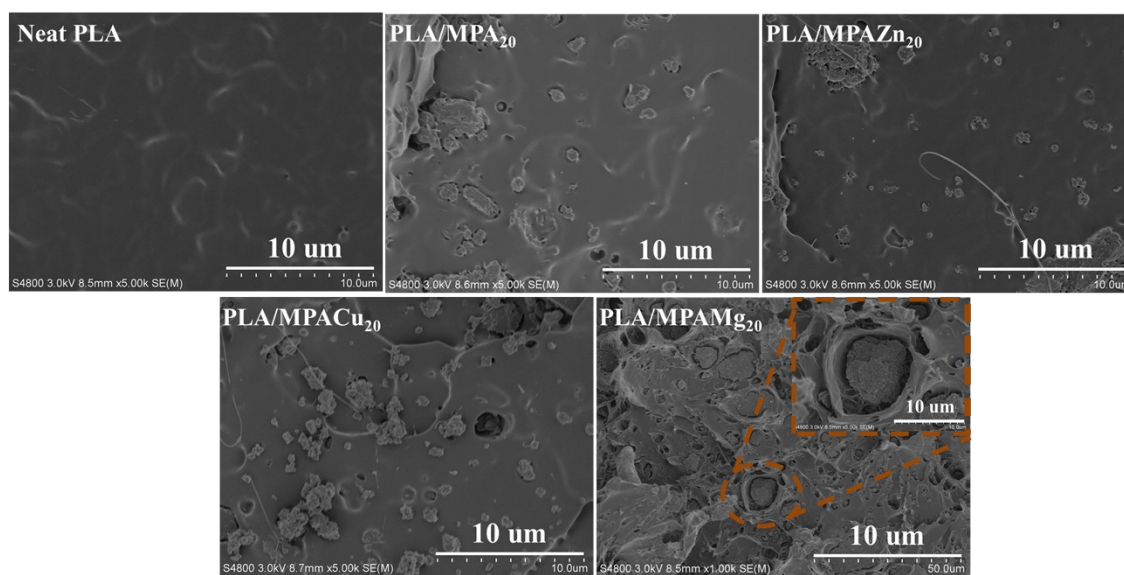

**Figure S5.** Representative SEM images of tensile fractured surfaces after tensile failure of neat PLA, PLA/MPA<sub>20</sub>, PLA/MPAZn<sub>20</sub>, PLA/MPACu<sub>20</sub>, and PLA/MPAMg<sub>20</sub> films.

**Table S4.** Mechanical Properties and Number-average Molecule Weights ( $M_n$ ) of Neat PLA and PLA Composites

| Samples                 | Initial Young's modulus (MPa) | Tensile strength (MPa) | Elongation at break (%) | Number-average Molecule Weight (Daltons) |
|-------------------------|-------------------------------|------------------------|-------------------------|------------------------------------------|
| Neat PLA                | 2617.5±105.4                  | 73.5±4.9               | 6.5±0.2                 | 9.1×10 <sup>4</sup>                      |
| PLA/MPA <sub>20</sub>   | 2513.4±168.4                  | 45.3±0.7               | 2.4±0.1                 | 7.7×10 <sup>4</sup>                      |
| PLA/MPACu <sub>20</sub> | 2537.5±144.9                  | 35.2±1.0               | 1.8±0.1                 | 6.5×10 <sup>4</sup>                      |
| PLA/MPAZn <sub>20</sub> | 2514.6±191.3                  | 46.8±4.1               | 2.3±0.2                 | 7.8×10 <sup>4</sup>                      |
| PLA/MPAMg <sub>20</sub> | 2119.2±168.5                  | 10.7±4.2               | 0.7±0.1                 | 3.9×10 <sup>4</sup>                      |

**Table S5.** Combustion Data of PLA and PLA Composites in Cone Calorimeter Test

| Sample                    | PLA         | PLA/MPA <sub>20</sub> | PLA/MPACu <sub>20</sub> | PLA/MPAZn <sub>20</sub> | PLAMPAMg <sub>20</sub> |
|---------------------------|-------------|-----------------------|-------------------------|-------------------------|------------------------|
| TTI (s)                   | 58 ± 2      | 38 ± 1                | 38 ± 1                  | 41 ± 1                  | 44 ± 2                 |
| PHRR (kW/m <sup>2</sup> ) | 333.3 ± 9.5 | 241.6 ± 6.3           | 258.3 ± 5.9             | 183.1 ± 2.8             | 171.5 ± 1.6            |
| THR (MJ/m <sup>2</sup> )  | 42.8 ± 1.5  | 35.9 ± 1.2            | 36.7 ± 0.7              | 33.8 ± 0.8              | 31.9 ± 1.0             |
| TSP (m <sup>2</sup> )     | 1.2 ± 0.1   | 17.1 ± 1.8            | 8.8 ± 0.6               | 3.2 ± 0.3               | 5.2 ± 0.4              |

**Table S6.** The Semi-quantitative Elemental Proportion of Char Residues for PLA Composites Measured by XPS

| Samples                 | C(At.%) | O(At.%) | N(At.%) | P(At.%) | R <sup>2+</sup> (At.%) |
|-------------------------|---------|---------|---------|---------|------------------------|
| PLA/MPA <sub>20</sub>   | 66.9    | 25.1    | 2.0     | 6.1     | 0                      |
| PLA/MPACu <sub>20</sub> | 44.9    | 34.3    | 4.0     | 13.7    | 3.0                    |
| PLA/MPAZn <sub>20</sub> | 45.8    | 34.1    | 4.5     | 12.8    | 2.7                    |
| PLA/MPAMg <sub>20</sub> | 59.4    | 25.1    | 8.3     | 6.3     | 0.6                    |
